# Supplementary material
Source: publisher figshare collection journal article supplement (https://gsajournals.figshare.com/ndownloader/files/25497911)
Supplement: Supplementary file 1 [file 25497911]

## Sheet: Sheet4
		Not a Kinase
Flybase ID	Annotation Symbol	Name	Symbol
FBgn0000017	CG4032	Abl tyrosine kinase	Abl
FBgn0028484	CG14992	Activated Cdc42 kinase	Ack
FBgn0263998	CG43741	Activated Cdc42 kinase-like	Ack-like
FBgn0035039	CG3608	aarF domain containing kinase	Adck
FBgn0036337	CG11255	Adenosine Kinase	AdenoK
FBgn0022709	CG17146	Adenylate kinase 1	Adk1
FBgn0283494	CG3140	Adenylate kinase 2	Adk2
FBgn0042094	CG6612	Adenylate kinase 3	Adk3
FBgn0037679	CG8866	Another Drosophila Unc-51-like kinase	Aduk
FBgn0026602	CG1851	Ady43A	Ady43A
FBgn0033754	CG8816	Adenylate kinase 6	Ak6
FBgn0010379	CG4006	Akt1	Akt1
FBgn0260972	CG8057	alicorn	alc
FBgn0040505	CG8250	Anaplastic lymphoma kinase	Alk
FBgn0023169	CG3051	AMP-activated protein kinase 𝛼 subunit	AMPK𝛼
FBgn0261854	CG42783	atypical protein kinase C	aPKC
FBgn0000116	CG32031	Arginine kinase	Argk
FBgn0039908	CG11533	Asator	Asator
FBgn0014006	CG4720	Apoptotic signal-regulating kinase 1	Ask1 (Pk92B)
FBgn0260945	CG10967	Autophagy-related 1	Atg1
FBgn0000147	CG3068	aurora A	aurA
FBgn0024227	CG6620	aurora B	aurB (ial)
FBgn0037218	CG1107	auxilin	aux
FBgn0000150	CG2210	abnormal wing discs	awd
FBgn0011300	CG8224	baboon	babo
FBgn0027889	CG6386	ballchen	ball
FBgn0085385	CG34356	black match	bma
FBgn0000229	CG5680	basket	bsk
FBgn0005666	CG32019	bent	bt
FBgn0003502	CG8049	Btk family kinase at 29A	Btk29A
FBgn0285896	CG32134	breathless	btl
FBgn0031696	CG14030	Bub1 kinase	Bub1
FBgn0263855	CG7838	Bub1-related kinase	BubR1
FBgn0022800	CG10244	Cadherin 96Ca	Cad96Ca
FBgn0016126	CG1495	Calcium/calmodulin-dependent protein kinase I	CaMKI
FBgn0264607	CG18069	Calcium/calmodulin-dependent protein kinase II	CaMKII
FBgn0013759	CG6703	CASK	CASK
FBgn0033842	CG5970	crowded by cid	cbc
FBgn0013435	CG1362	Cdc2-related kinase	Cdc2rk
FBgn0028360	CG32742	Cdc7 kinase	Cdc7
FBgn0004876	CG6027	center divider	cdi
FBgn0004106	CG5363	Cyclin-dependent kinase 1	Cdk1
FBgn0037093	CG7597	Cyclin-dependent kinase 12	Cdk12
FBgn0004107	CG10498	Cyclin-dependent kinase 2	Cdk2
FBgn0016131	CG5072	Cyclin-dependent kinase 4	Cdk4
FBgn0013762	CG8203	Cyclin-dependent kinase 5	Cdk5
FBgn0027491	CG5387	Cdk5 activator-like protein	Cdk5𝛼
FBgn0263237	CG3319	Cyclin-dependent kinase 7	Cdk7
FBgn0015618	CG10572	Cyclin-dependent kinase 8	Cdk8
FBgn0019949	CG5179	Cyclin-dependent kinase 9	Cdk9
FBgn0037315	CG16708	Ceramide kinase	Cerk
FBgn0034644	CG10082	-	CG10082
FBgn0039083	CG10177	-	CG10177
FBgn0032811	CG10268	-	CG10268
FBgn0032752	CG10702	-	CG10702
FBgn0036368	CG10738	-	CG10738
FBgn0037115	CG11249	-	CG11249
FBgn0035397	CG11486	-	CG11486
FBgn0036099	CG11811	-	CG11811
FBgn0035436	CG12016	-	CG12016
FBgn0039796	CG12069	-	CG12069
FBgn0037325	CG12147	-	CG12147
FBgn0036723	CG12229	-	CG12229
FBgn0037491	CG1227	-	CG1227
FBgn0035392	CG1271	-	CG1271
FBgn0027507	CG1344	-	CG1344
FBgn0036439	CG13474	-	CG13474
FBgn0038961	CG13850	-	CG13850
FBgn0038630	CG14305	-	CG14305
FBgn0039799	CG15543	-	CG15543
FBgn0039809	CG15547	-	CG15547
FBgn0032424	CG17010	-	CG17010
FBgn0261387	CG17528	-	CG17528
FBgn0040056	CG17698	-	CG17698
FBgn0039623	CG1951	-	CG1951
FBgn0032955	CG2201	-	CG2201
FBgn0039790	CG2246	-	CG2246
FBgn0039790	CG2246		CG2246
FBgn0030384	CG2577	-	CG2577
FBgn0014930	CG2846	-	CG2846
FBgn0031462	CG2964	-	CG2964
FBgn0031643	CG3008	-	CG3008
FBgn0050274	CG30274	-	CG30274
FBgn0051140	CG31140	-	CG31140
FBgn0051145	CG31145	-	CG31145
FBgn0051183	CG31183	-	CG31183
FBgn0051643	CG31643	-	CG31643
FBgn0034568	CG3216	-	CG3216
FBgn0031518	CG3277	-	CG3277
FBgn0052944	CG32944	-	CG32944
FBgn0053156	CG33156	-	CG33156
FBgn0061359	CG33671	-	CG33671
FBgn0085386	CG34357	-	CG34357
FBgn0085413	CG34384	-	CG34384
FBgn0038268	CG3631	-	CG3631
FBgn0037995	CG3809	-	CG3809
FBgn0029736	CG4041	-	CG4041
FBgn0259712	CG42366	-	CG42366
FBgn0261360	CG42637	-	CG42637
FBgn0038373	CG4546	-	CG4546
FBgn0031299	CG4629	-	CG4629
FBgn0032187	CG4839	-	CG4839
FBgn0034137	CG4945	-	CG4945
FBgn0035957	CG5144	-	CG5144
FBgn0034299	CG5757	-	CG5757
FBgn0032677	CG5790	-	CG5790
FBgn0031682	CG5828	-	CG5828
FBgn0033853	CG6145	-	CG6145
FBgn0038321	CG6218	-	CG6218
FBgn0038902	CG6800	-	CG6800
FBgn0027587	CG7028	-	CG7028
FBgn0038952	CG7069	-	CG7069
FBgn0032650	CG7094	-	CG7094
FBgn0038588	CG7156	-	CG7156
FBgn0031730	CG7236	-	CG7236
FBgn0036941	CG7335	-	CG7335
FBgn0038258	CG7362	-	CG7362
FBgn0037146	CG7470	-	CG7470
FBgn0030087	CG7766	-	CG7766
FBgn0033373	CG8080	-	CG8080
FBgn0030864	CG8173	-	CG8173
FBgn0033673	CG8298	-	CG8298
FBgn0034141	CG8311	-	CG8311
FBgn0034073	CG8414	-	CG8414
FBgn0031995	CG8475	-	CG8475
FBgn0033915	CG8485	-	CG8485
FBgn0030697	CG8565	-	CG8565
FBgn0033244	CG8726	-	CG8726
FBgn0027504	CG8878	-	CG8878
FBgn0031784	CG9222	-	CG9222
FBgn0032083	CG9541	-	CG9541
FBgn0037578	CG9601	-	CG9601
FBgn0031428	CG9886	-	CG9886
FBgn0031451	CG9961	-	CG9961
FBgn0031441	CG9962	-	CG9962
FBgn0264492	CG17520	casein kinase IIα	CkIIα
FBgn0000259	CG1524	casein kinase II𝛽 subunit	CkII𝛽
FBgn0015024	CG2028	casein kinase Iα	CkIα
FBgn0052649	CG32649	Coenzyme Q8	Coq8
FBgn0262081	CG42317	C-terminal Src kinase	Csk
FBgn0022936	CG7405	Cyclin H	CycH
FBgn0025455	CG6292	Cyclin T	CycT
FBgn0028833	CG6092	Dak1	Dak1
FBgn0002413	CG2048	discs overgrown	dco
FBgn0053531	CG33531	Discoidin domain receptor	Ddr
FBgn0085390	CG34361	Diacyl glycerol kinase	Dgk
FBgn0020930	CG8657	Diacyl glycerol kinase 𝜀	Dgk𝜀
FBgn0001624	CG1725	discs large 1	dlg1
FBgn0022338	CG5452	deoxyribonucleoside kinase	dnk
FBgn0024245	CG17559	doughnut on 2	dnt
FBgn0265998	CG42320	Darkener of apricot	Doa
FBgn0267390	CG6498	drop out	dop
FBgn0037469	CG1939	Dephospho-CoA kinase	Dpck
FBgn0052666	CG32666	Death-associated protein kinase related	Drak
FBgn0004638	CG6033	downstream of receptor kinase	drk
FBgn0015380	CG17348	derailed	drl
FBgn0033791	CG3915	Derailed 2	Drl-2
FBgn0010269	CG15793	Downstream of raf1	Dsor1
FBgn0016930	CG4551	Dual-specificity tyrosine phosphorylation-regulated kinase 2	Dyrk2
FBgn0027101	CG40478	Dual-specificity tyrosine phosphorylation-regulated kinase 3	Dyrk3
FBgn0000535	CG10952	ether a go-go	eag
FBgn0000536	CG3525	easily shocked	eas
FBgn0003731	CG10079	Epidermal growth factor receptor	Egfr
FBgn0005640	CG10579	Ecdysone-induced protein 63E	Eip63E
FBgn0011589	CG5076	Eag-like K[+] channel	Elk
FBgn0025936	CG1511	Eph receptor tyrosine kinase	Eph
FBgn0052703	CG32703	Extracellularly regulated kinase 7	Erk7
FBgn0028741	CG6355	fab1 kinase	fab1
FBgn0020440	CG10023	Focal adhesion kinase	Fak
FBgn0011205	CG5725	fumble	fbl
FBgn0000723	CG8874	FER tyrosine kinase (Fps85D)	FER
FBgn0000658	CG10917	four-jointed	fj
FBgn0000721	CG10033	foraging	for
FBgn0023083	CG7693	frayed	fray
FBgn0001079	CG6551	fused	fu
FBgn0004373	CG7004	four wheel drive	fwd
FBgn0266465	CG5169	Germinal centre kinase III	GckIII
FBgn0019990	CG1609	Gcn2	Gcn2
FBgn0023081	CG4012	genghis khan	gek
FBgn0250823	CG6963	gilgamesh	gish
FBgn0025592	CG18374	Glycerol kinase 1	Gk1
FBgn0035266	CG7995	Glycerol kinase 2	Gk2
FBgn0260798	CG40129	G protein-coupled receptor kinase 1	Gprk1
FBgn0261988	CG17998	G protein-coupled receptor kinase 2	Gprk2
FBgn0029830	CG14447	Glutamate receptor binding protein	Grip
FBgn0261278	CG17161	grapes	grp
FBgn0046332	CG31003	gasket	gskt
FBgn0260399	CG7719	greatwall	gwl
FBgn0010197	CG33114	Guanylyl cyclase at 32E	Gyc32E
FBgn0266136	CG42636	Guanylyl cyclase at 76C	Gyc76C
FBgn0046706	CG40080	Haspin	Haspin
FBgn0010303	CG4353	hemipterous	hep
FBgn0035142	CG17090	Homeodomain interacting protein kinase	Hipk
FBgn0004864	CG1594	hopscotch	hop
FBgn0261456	CG11228	hippo	hpo
FBgn0263395	CG7097	happyhour	hppy
FBgn0010389	CG7223	heartless	htl
FBgn0024222	CG4201	I-kappaB kinase 𝛽	IKK𝛽
FBgn0086657	CG2615	I-kappaB kinase ε	IKKε (ik2)
FBgn0028427	CG10504	Integrin linked kinase	Ilk
FBgn0004784	CG6518	inactivation no afterpotential C	inaC
FBgn0283499	CG18402	Insulin-like receptor	InR
FBgn0032147	CG4026	Inositol 1,4,5-triphosphate kinase 1	IP3K1
FBgn0283680	CG45017	Inositol 1,4,5-triphosphate kinase 2	IP3K2
FBgn0050295	CG30295	Ipk1	Ipk1
FBgn0031267	CG13688	Ipk2	Ipk2
FBgn0261984	CG4583	Inositol-requiring enzyme-1	Ire1
FBgn0020412	CG6297	JIL-1 kinase	JIL-1
FBgn0026064	CG6715	KP78a	KP78a
FBgn0026063	CG17216	KP78b	KP78b
FBgn0035639	CG5537	krishah	kri
FBgn0015402	CG2899	kinase suppressor of ras	ksr
FBgn0027279	CG14616	lethal (1) G0196	l(1)G0196
FBgn0022029	CG4798	lethal (2) k01209	l(2)k01209
FBgn0261524	CG12244	licorne	lic
FBgn0283712	CG1848	LIM domain kinase 1	LIMK1
FBgn0017581	CG17342	Lk6 kinase	Lk6
FBgn0038167	CG9374	Lkb1 kinase	lkb1
FBgn0019686	CG10895	loki	lok
FBgn0038816	CG5483	Leucine-rich repeat kinase	Lrrk
FBgn0005584	-	MabF7D6	MabF7D6
FBgn0027497	CG1098	MLF1-adaptor molecule	Madm
FBgn0013987	CG3086	MAP kinase activated protein-kinase-2	MAPk-Ak2
FBgn0024956	CG7614	Menage a trois 1	Mat1
FBgn0025743	CG18582	mushroom bodies tiny	mbt
FBgn0004367	CG4252	meiotic 41	mei-41
FBgn0024329	CG7717	Mekk1	Mekk1
FBgn0031855	CG11221	meng-po	meng
FBgn0024326	CG9738	MAP kinase kinase 4	Mkk4
FBgn0259168	CG42273	minibrain	mnb
FBgn0033773	CG8767	Mos oncogene	mos
FBgn0000063	CG7643	Monopolar spindle 1	Mps1
FBgn0035107	CG1216	mrityu	mri
FBgn0261109	CG7764	marionette	mrn
FBgn0010909	CG16973	misshapen	msn
FBgn0260750	CG31873	Multi-substrate lipid kinase	Mulk
FBgn0040298	CG32417	Myt1	Myt1
FBgn0015772	CG10637	Numb-associated kinase	Nak
FBgn0029970	CG17256	Nek2	Nek2
FBgn0045980	CG10951	nimA-like kinase	niki
FBgn0002938	CG5125	neither inactivation nor afterpotential C	ninaC
FBgn0053554	CG33554	Nipped-A	Nipped-A
FBgn0030573	CG5310	nmdyn-D6	nmdyn-D6
FBgn0028997	CG8362	nmdyn-D7	nmdyn-D7
FBgn0011817	CG7892	nemo	nmo
FBgn0263968	CG32743	no-on-and-no-off transient C	nonC
FBgn0020391	CG4007	Neurospecific receptor kinase	Nrk
FBgn0262617	CG43143	Nuak1 ortholog	Nuak1
FBgn0004839	CG8967	off-track	otk
FBgn0015765	CG5475	p38a MAP kinase	p38a (Mpk2)
FBgn0024846	CG7393	p38b MAP kinase	p38b
FBgn0267339	CG33338	p38c MAP kinase	p38c
FBgn0267698	CG10295	p21-activated kinase	Pak
FBgn0044826	CG14895	Pak3	Pak3
FBgn0020389	CG8363	PAPS synthetase	Papss
FBgn0260934	CG8201	par-1	par-1
FBgn0034950	CG3105	PAS kinase	Pask
FBgn0017558	CG8808	Pyruvate dehydrogenase kinase	Pdk
FBgn0020386	CG1210	Phosphoinositide-dependent kinase 1	Pdk1
FBgn0085484	CG34455	Pyridoxal kinase	Pdxk
FBgn0037327	CG2087	pancreatic eIF-2alpha kinase	PEK
FBgn0003071	CG4001	Phosphofructokinase	Pfk
FBgn0027621	CG3400	6-phosphofructo-2-kinase	Pfrx
FBgn0250906	CG3127	Phosphoglycerate kinase	Pgk
FBgn0011754	CG1830	Phosphorylase kinase γ	PhKγ
FBgn0015277	CG5373	Phosphotidylinositol 3 kinase 59F	Pi3K59F
FBgn0015278	CG11621	Phosphotidylinositol 3 kinase 68D	Pi3K68D
FBgn0015279	CG4141	Pi3K92E	Pi3K92E
FBgn0267350	CG10260	Phosphatidylinositol 4-kinase III 𝛼	PI4KIII𝛼
FBgn0037339	CG2929	1-phosphatidylinositol 4-kinase	Pi4KII𝛼
FBgn0029891	CG4523	PTEN-induced putative kinase 1	Pink1
FBgn0039924	CG17471	Phosphatidylinositol 5-phosphate 4-kinase	PIP4K
FBgn0034789	CG3682	Phosphatidylinositol 4-phosphate 5-kinase at 59B	PIP5K59B
FBgn0016696	CG4268	Pitslre	Pitslre
FBgn0028410	CG5182	Pk34A	Pk34A
FBgn0000273	CG4379	Protein kinase, cAMP-dependent, catalytic subunit 1	Pka-C1
FBgn0000274	CG12066	Protein kinase, cAMP-dependent, catalytic subunit 2	Pka-C2
FBgn0000489	CG6117	Protein kinase, cAMP-dependent, catalytic subunit 3	Pka-C3
FBgn0003091	CG6622	Protein C kinase 53E	Pkc53E
FBgn0003093	CG1954	Protein C kinase 98E	Pkc98E
FBgn0259680	CG42349	Protein kinase C δ	Pkcδ
FBgn0038603	CG7125	Protein Kinase D	PKD
FBgn0000442	CG3324	Protein kinase, cGMP-dependent at 21D	Pkg21D
FBgn0020621	CG2049	Protein kinase N	Pkn
FBgn0010441	CG5974	pelle	pll
FBgn0000826	CG11420	pan gu	png
FBgn0003124	CG12306	polo	polo
FBgn0035632	CG10575	Bifunctional Phosphopantetheine adenylyltransferase - Dephospho-CoA kinase	Ppat-Dpck
FBgn0035590	CG10673	p53-related protein kinase	Prpk
FBgn0003169	CG7904	punt	put
FBgn0032006	CG8222	PDGF- and VEGF-receptor related	Pvr
FBgn0262614	CG43140	polychaetoid	pyd
FBgn0267385	CG7070	Pyruvate kinase	PyK
FBgn0034728	CG6339	rad50	rad50
FBgn0003079	CG2845	Raf oncogene	Raf (phl)
FBgn0261549	CG42667	retinal degeneration A	rdgA
FBgn0011829	CG14396	Ret oncogene	Ret
FBgn0036187	CG11660	RIO kinase 1	RIOK1
FBgn0039306	CG11859	RIO kinase 2	RIOK2
FBgn0003256	CG12559	rolled	rl
FBgn0026181	CG9774	Rho kinase	Rok
FBgn0010407	CG4926	Ror	Ror
FBgn0283472	CG10539	Ribosomal protein S6 kinase	S6k
FBgn0262866	CG17596	Ribosomal protein S6 kinase II	S6kII
FBgn0283473	CG7001	S6 Kinase Like	S6KL
FBgn0026371	CG7186	Sak kinase	SAK
FBgn0003317	CG1891	saxophone	sax
FBgn0038279	CG3837	Secreted decoy of InR	Sdr
FBgn0261873	CG32717	stardust	sdt
FBgn0003366	CG18085	sevenless	sev
FBgn0036544	CG6114	sugar-free frosting	sff
FBgn0003371	CG2621	shaggy	sgg
FBgn0015295	CG18247	SH2 ankyrin repeat kinase	Shark
FBgn0025625	CG4290	Salt-inducible kinase 2	Sik2
FBgn0262103	CG42856	Salt-inducible kinase 3	Sik3
FBgn0030300	CG1747	Sphingosine kinase 1	Sk1
FBgn0052484	CG32484	Sphingosine kinase 2	Sk2
FBgn0016984	CG9985	skittles	sktl
FBgn0035001	CG4527	Sterile20-like kinase	Slik
FBgn0264087	CG43756	Slowpoke binding protein	Slob
FBgn0030018	CG2272	slipper	slpr
FBgn0086906	CG1915	sallimus	sls
FBgn0264357	CG17299	SNF4/AMP-activated protein kinase gamma subunit	SNF4A𝛾
FBgn0259678	CG42347	spaghetti-squash activator	sqa
FBgn0264959	CG44128	Src oncogene at 42A	Src42A
FBgn0262733	CG7524	Src oncogene at 64B	Src64B
FBgn0286813	CG8174	SR Protein Kinase	SRPK
FBgn0025702	CG11489	Serine-arginine protein kinase at 79D	Srpk79D
FBgn0015300	CG13591	Suppressor of Stellate-like	Ssl
FBgn0002466	CG10522	sticky	sti
FBgn0046692	CG40293	Ste20-like kinase	Stlk
FBgn0265045	CG44162	Stretchin-Mlck	Strn-Mlck
FBgn0010355	CG17603	TBP-associated factor 1	Taf1
FBgn0026323	CG18492	TGF-beta activated kinase 1	Tak1
FBgn0046689	CG31421	Tak1-like 1	Takl1
FBgn0039015	CG4803	Tak1-like 2	Takl2
FBgn0031030	CG14217	Tao	Tao
FBgn0045035	CG6535	telomere fusion	tefu
FBgn0033929	CG8151	Transcription factor B1	Tfb1
FBgn0031309	CG5041	Transcription factor B4	Tfb4
FBgn0014073	CG7525	Tie-like receptor tyrosine kinase	Tie
FBgn0003716	CG14026	thickveins	tkv
FBgn0283657	CG34412	Tousled-like kinase	Tlk
FBgn0003733	CG1389	torso	tor
FBgn0021796	CG5092	Target of rapamycin	Tor
FBgn0028978	CG5408	tribbles	trbl
FBgn0003744	CG8637	tricornered	trc
FBgn0003882	CG10520	tube	tub
FBgn0263398	CG6364	Uridine-cytidine kinase	Uck
FBgn0053519	CG33519	Unc-89	Unc-89
FBgn0250785	CG9326	varicose	vari
FBgn0260935	CG9746	Vacuolar protein sorting 15	Vps15
FBgn0011737	CG4488	Wee1 kinase	Wee1
FBgn0024179	CG10776	wishful thinking	wit
FBgn0036896	CG8789	wallenda	wnd
FBgn0037098	CG7177	Wnk kinase	Wnk
FBgn0046685	CG31127	Wsck	Wsck
FBgn0011739	CG12072	warts	wts
FBgn0260990	CG1973	yata	yata
